# Supplementary material
Source: Research Square preprint supplement (doi:10.21203/rs.3.rs-9259550/v1)
Supplement: Supplementary file 2 [file dbec1d153d15990b738b23b2.pdf]

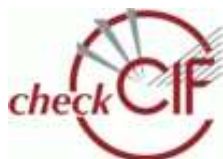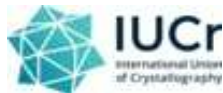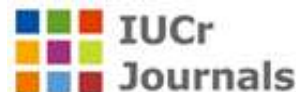

## checkCIF/PLATON report

Structure factors have been supplied for datablock(s) 12.17\_auto

THIS REPORT IS FOR GUIDANCE ONLY. IF USED AS PART OF A REVIEW PROCEDURE FOR PUBLICATION, IT SHOULD NOT REPLACE THE EXPERTISE OF AN EXPERIENCED CRYSTALLOGRAPHIC REFEREE.

No syntax errors found.      CIF dictionary      Interpreting this report

### Datablock: 12.17\_auto

---

|                        |                      |                      |               |
|------------------------|----------------------|----------------------|---------------|
| Bond precision:        | C-C = 0.0051 Å       | Wavelength=1.54184   |               |
| Cell:                  | a=10.1331 (1)        | b=10.1331 (1)        | c=20.9219 (3) |
|                        | alpha=90             | beta=90              | gamma=120     |
| Temperature:           | 100 K                |                      |               |
|                        | Calculated           | Reported             |               |
| Volume                 | 1860.44 (5)          | 1860.44 (5)          |               |
| Space group            | P 32 2 1             | P 32 2 1             |               |
| Hall group             | P 32 2 "             | P 32 2 "             |               |
| Moiety formula         | C22 H28 Br2 Co O2 P2 | C22 H28 Br2 Co O2 P2 |               |
| Sum formula            | C22 H28 Br2 Co O2 P2 | C22 H28 Br2 Co O2 P2 |               |
| Mr                     | 605.11               | 605.13               |               |
| Dx, g cm <sup>-3</sup> | 1.620                | 1.620                |               |
| Z                      | 3                    | 3                    |               |
| Mu (mm <sup>-1</sup> ) | 10.540               | 10.540               |               |
| F000                   | 909.0                | 909.0                |               |
| F000'                  | 901.24               |                      |               |
| h, k, lmax             | 12, 12, 26           | 12, 12, 26           |               |
| Nref                   | 2611 [ 1526]         | 2522                 |               |
| Tmin, Tmax             | 0.182, 0.349         | 0.563, 1.000         |               |
| Tmin'                  | 0.081                |                      |               |

Correction method= # Reported T Limits: Tmin=0.563 Tmax=1.000  
AbsCorr = MULTI-SCAN

Data completeness= 1.65/0.97                   Theta(max)= 76.327

R(reflections)= 0.0222( 2458)

wR2(reflections)=  
0.0522( 2522)

S = 1.041

Npar= 136

---

The following ALERTS were generated. Each ALERT has the format

**test-name\_ALERT\_alert-type\_alert-level.**

Click on the hyperlinks for more details of the test.

---

● **Alert level G**

|                   |                                                      |       |        |
|-------------------|------------------------------------------------------|-------|--------|
| PLAT033_ALERT_4_G | Flack x Value Deviates > 3.0 * Sigma from Zero .     | 0.198 | Note   |
| PLAT720_ALERT_4_G | Number of Unusual/Non-Standard Labels .....          | 29    | Note   |
|                   | Br01 Co02 P003 O004 C005 C006 C007 H007              |       |        |
|                   | C008 H008 C009 H00A H00B C00A H00C C00B              |       |        |
|                   | C00C H00D H00E H00F C00D C00E H00G H00H              |       |        |
|                   | H00I C00F H00J H00K H00L                             |       |        |
| PLAT912_ALERT_4_G | Missing # of FCF Reflections Above STh/L= 0.600      | 32    | Note   |
| PLAT969_ALERT_5_G | The 'Henn et al.' R-Factor-gap value .....           | 2.003 | Note   |
|                   | Predicted wR2: Based on SigI**2 2.61 or SHELX Weight | 5.01  |        |
| PLAT978_ALERT_2_G | Number C-C Bonds with Positive Residual Density.     | 2     | Info   |
| PLAT994_ALERT_1_G | SHELXL .ins Contains no or MERG 0 Instruction ..     |       | ! Note |

---

0 **ALERT level A** = Most likely a serious problem - resolve or explain  
0 **ALERT level B** = A potentially serious problem, consider carefully  
0 **ALERT level C** = Check. Ensure it is not caused by an omission or oversight  
6 **ALERT level G** = General information/check it is not something unexpected

1 ALERT type 1 CIF construction/syntax error, inconsistent or missing data  
1 ALERT type 2 Indicator that the structure model may be wrong or deficient  
0 ALERT type 3 Indicator that the structure quality may be low  
3 ALERT type 4 Improvement, methodology, query or suggestion  
1 ALERT type 5 Informative message, check

---

It is advisable to attempt to resolve as many as possible of the alerts in all categories. Often the minor alerts point to easily fixed oversights, errors and omissions in your CIF or refinement strategy, so attention to these fine details can be worthwhile. It is up to the individual to critically assess their own results and, if necessary, seek expert advice.

---

**PLATON version of 15/01/2026; check.def file version of 02/01/2026**

---
